# Supplementary material
Source: PubMed Central journal article supplement (PMC5897040)
Supplement: NIHMS955835-supplement-Table_S1.pdf [file NIHMS955835-supplement-Table_S1.pdf]

**Table S1. cDNA clones for in situ hybridization probes**

| <b>Gene</b>                                         | <b>Symbol</b> | <b>GeneBank</b>   | <b>Clone ID</b> | <b>Catalog number</b> |
|-----------------------------------------------------|---------------|-------------------|-----------------|-----------------------|
| <b>suppressor of cytokine signaling 3</b>           | socs3         | BC068752 BU906116 | 6631072         | MXL1736-202775026     |
| <b>activating transcription factor 3</b>            | atf3          | BC080002 CF546998 | 7007938         | MXL1736-202775774     |
| <b>peripherin</b>                                   | prph          | BC045209          | 5543232         | MXL1736-202774284     |
| <b>RNA binding protein with multiple splicing 2</b> | rbpms         | BC081153.1        | 6955186         | MXL1736-202788345     |
| <b>growth associated protein 43</b>                 | gap43         | BC042240 BQ737328 | 5571286         | MXL1736-202774520     |
| <b>Kruppel-like factor 6</b>                        | klf6          | BC044713          | 5572195         | MXL1736-202774654     |
| <b>ubiquitin carboxyl-terminal esterase L1</b>      | uchl1         | BC106642          | 7019544         | MXL1736-202788646     |
