# Supplementary material
Source: PubMed Central journal article supplement (PMC5897040)
Supplement: NIHMS955835-supplement-Table_S2.pdf [file NIHMS955835-supplement-Table_S2.pdf]

**Table S2. RT-qPCR clones and primer sequences**

| <b>Gene Identification</b>                         | <b>Gene Symbol</b>      | <b>GenBank</b>             | <b>Forward primer</b> | <b>Reverse primer</b> |
|----------------------------------------------------|-------------------------|----------------------------|-----------------------|-----------------------|
| peripherin                                         | <i>prph</i>             | <a href="#">BC045209</a>   | aagacagggaccacatccag  | ggcatcatccacatccttc   |
| eukaryotic translation elongation factor 1 alpha 1 | <i>eef1a1</i>           | <a href="#">BC041196</a>   | aagaatgaccaccaatgga   | gcaagcaatgtgagcagtgt  |
| $\gamma$ -synuclein                                | <i>sncg</i>             | <a href="#">BC054269.1</a> | aaccaagaacaggccaatg   | ggttcttctggctgatctgg  |
| $\alpha$ -synuclein                                | <i>snca</i>             | <a href="#">BC054200.1</a> | caaacagggagtggcagaa   | agcaaaattaccggctcctt  |
| $\beta$ -synuclein                                 | <i>scnb</i>             | <a href="#">BC084970.1</a> | gcttggaggagctgtcatgt  | tcctgtggggccttctcata  |
| POU class 4 homeobox 1                             | <i>pou4f1.2 (brn3d)</i> | <a href="#">AF184979.1</a> | ttggccaatttgaagattcc  | tcaggtttggccattttctc  |
| neurofilament- light                               | <i>nefl</i>             | <a href="#">BC084400.1</a> | ccacttactctccgctggtt  | atthtcaggtcgctgctgat  |
| neurofilament- medium                              | <i>nefm</i>             | <a href="#">BC074454.1</a> | aaggtggagctggacaagaa  | gtgatgcttgaggcttggat  |
| neurofilament- heavy                               | <i>nefh</i>             | <a href="#">BC136056</a>   | agcagcagctttcagtcaca  | tgctgcaaactacggttctg  |
| ubiquitin carboxyl-terminal esterase L1            | <i>uchl1</i>            | <a href="#">BC106642</a>   | caatgcagggagaacagtga  | aagtgcttcagaggttggga  |
| neuritin 1                                         | <i>nrn1</i>             | <a href="#">BC082893</a>   | cggtgaaggctacaggcaaa  | ctgcccttctgacaatcc    |
