# Supplementary material
Source: PubMed Central journal article supplement (PMC5897040)
Supplement: NIHMS955835-supplement-Table_S3.pdf [file NIHMS955835-supplement-Table_S3.pdf]

**Table S3. Enriched GO biological process terms in down-regulated genes**

| <b>GO ID</b>      | <b>Enrichment (p-value)</b> | <b>Number down-regulated</b> | <b>Total</b> | <b>Term</b>                                                                                 | <b>Ontology</b> |
|-------------------|-----------------------------|------------------------------|--------------|---------------------------------------------------------------------------------------------|-----------------|
| <b>GO:0007268</b> | 1.9E-23                     | 92                           | 296          | synaptic transmission                                                                       | BP              |
| <b>GO:0005887</b> | 2.0E-21                     | 127                          | 524          | integral component of plasma membrane                                                       | CC              |
| <b>GO:0005886</b> | 9.9E-19                     | 289                          | 1763         | plasma membrane                                                                             | CC              |
| <b>GO:0045211</b> | 6.4E-18                     | 55                           | 152          | postsynaptic membrane                                                                       | CC              |
| <b>GO:0030054</b> | 3.1E-16                     | 88                           | 348          | cell junction                                                                               | CC              |
| <b>GO:0016021</b> | 1.0E-14                     | 330                          | 2216         | integral component of membrane                                                              | CC              |
| <b>GO:0007218</b> | 4.4E-12                     | 26                           | 55           | neuropeptide signaling pathway                                                              | BP              |
| <b>GO:0007186</b> | 5.5E-12                     | 61                           | 236          | G-protein coupled receptor signaling pathway                                                | BP              |
| <b>GO:0006811</b> | 2.8E-10                     | 46                           | 169          | ion transport                                                                               | BP              |
| <b>GO:0043204</b> | 3.7E-09                     | 24                           | 62           | perikaryon                                                                                  | CC              |
| <b>GO:0051930</b> | 1.1E-08                     | 14                           | 24           | regulation of sensory perception of pain                                                    | BP              |
| <b>GO:0042734</b> | 1.5E-08                     | 23                           | 61           | presynaptic membrane                                                                        | CC              |
| <b>GO:0070588</b> | 2.4E-08                     | 27                           | 83           | calcium ion transmembrane transport                                                         | BP              |
| <b>GO:0005216</b> | 3.4E-08                     | 26                           | 78           | ion channel activity                                                                        | MF              |
| <b>GO:0005509</b> | 3.8E-08                     | 73                           | 377          | calcium ion binding                                                                         | MF              |
| <b>GO:0007187</b> | 5.3E-08                     | 14                           | 26           | G-protein coupled receptor signaling pathway, coupled to cyclic nucleotide second messenger | BP              |
| <b>GO:0007165</b> | 8.2E-08                     | 114                          | 692          | signal transduction                                                                         | BP              |
| <b>GO:0051965</b> | 8.3E-08                     | 20                           | 52           | positive regulation of synapse assembly                                                     | BP              |
| <b>GO:0007156</b> | 8.8E-08                     | 19                           | 48           | homophilic cell adhesion via plasma membrane adhesion molecules                             | BP              |
| <b>GO:0005576</b> | 1.4E-07                     | 77                           | 412          | extracellular region                                                                        | CC              |
| <b>GO:0030594</b> | 2.2E-07                     | 13                           | 25           | neurotransmitter receptor activity                                                          | MF              |
| <b>GO:0031226</b> | 2.2E-07                     | 10                           | 15           | intrinsic component of plasma membrane                                                      | CC              |
| <b>GO:0005230</b> | 2.3E-07                     | 13                           | 25           | extracellular ligand-gated ion channel activity                                             | MF              |

|                   |         |    |     |                                                                           |    |
|-------------------|---------|----|-----|---------------------------------------------------------------------------|----|
| <b>GO:0004930</b> | 2.4E-07 | 27 | 91  | G-protein coupled receptor activity                                       | MF |
| <b>GO:0008146</b> | 2.4E-07 | 16 | 37  | sulfotransferase activity                                                 | MF |
| <b>GO:0008076</b> | 3.6E-07 | 24 | 75  | voltage-gated potassium channel complex                                   | CC |
| <b>GO:0061337</b> | 3.9E-07 | 22 | 66  | cardiac conduction                                                        | BP |
| <b>GO:0007409</b> | 5.0E-07 | 24 | 78  | axonogenesis                                                              | BP |
| <b>GO:0071805</b> | 5.1E-07 | 21 | 62  | potassium ion transmembrane transport                                     | BP |
| <b>GO:0007626</b> | 5.1E-07 | 22 | 67  | locomotory behavior                                                       | BP |
| <b>GO:0031290</b> | 8.6E-07 | 10 | 16  | retinal ganglion cell axon guidance                                       | BP |
| <b>GO:0007200</b> | 1.0E-06 | 11 | 20  | phospholipase C-activating G-protein coupled receptor signaling pathway   | BP |
| <b>GO:0006813</b> | 1.0E-06 | 27 | 96  | potassium ion transport                                                   | BP |
| <b>GO:0007193</b> | 1.7E-06 | 15 | 37  | adenylate cyclase-inhibiting G-protein coupled receptor signaling pathway | BP |
| <b>GO:0004890</b> | 2.6E-06 | 10 | 18  | GABA-A receptor activity                                                  | MF |
| <b>GO:0042755</b> | 3.5E-06 | 10 | 18  | eating behavior                                                           | BP |
| <b>GO:0016079</b> | 3.9E-06 | 7  | 9   | synaptic vesicle exocytosis                                               | BP |
| <b>GO:0005516</b> | 6.2E-06 | 29 | 118 | calmodulin binding                                                        | MF |
| <b>GO:0043198</b> | 6.3E-06 | 14 | 36  | dendritic shaft                                                           | CC |
| <b>GO:0034707</b> | 6.7E-06 | 13 | 32  | chloride channel complex                                                  | CC |
| <b>GO:0007267</b> | 6.7E-06 | 24 | 87  | cell-cell signaling                                                       | BP |
| <b>GO:1902476</b> | 8.4E-06 | 17 | 52  | chloride transmembrane transport                                          | BP |
| <b>GO:0060291</b> | 9.5E-06 | 14 | 37  | long-term synaptic potentiation                                           | BP |
| <b>GO:0034220</b> | 1.0E-05 | 30 | 127 | ion transmembrane transport                                               | BP |
| <b>GO:0010700</b> | 1.1E-05 | 5  | 5   | negative regulation of norepinephrine secretion                           | BP |
| <b>GO:0006821</b> | 1.5E-05 | 14 | 39  | chloride transport                                                        | BP |
| <b>GO:0008420</b> | 1.6E-05 | 20 | 69  | CTD phosphatase activity                                                  | MF |
| <b>GO:0043565</b> | 1.7E-05 | 40 | 196 | sequence-specific DNA binding                                             | MF |
| <b>GO:0042472</b> | 2.0E-05 | 12 | 30  | inner ear morphogenesis                                                   | BP |
| <b>GO:0005251</b> | 2.7E-05 | 10 | 22  | delayed rectifier potassium channel activity                              | MF |
| <b>GO:0004970</b> | 2.9E-05 | 7  | 11  | ionotropic glutamate receptor activity                                    | MF |
| <b>GO:0030165</b> | 3.1E-05 | 20 | 73  | PDZ domain binding                                                        | MF |

|                   |         |    |     |                                                                   |    |
|-------------------|---------|----|-----|-------------------------------------------------------------------|----|
| <b>GO:0009607</b> | 3.6E-05 | 7  | 11  | response to biotic stimulus                                       | BP |
| <b>GO:1901379</b> | 3.6E-05 | 7  | 11  | regulation of potassium ion transmembrane transport               | BP |
| <b>GO:0005615</b> | 3.7E-05 | 75 | 457 | extracellular space                                               | CC |
| <b>GO:0005267</b> | 5.2E-05 | 17 | 58  | potassium channel activity                                        | MF |
| <b>GO:0000158</b> | 5.3E-05 | 18 | 63  | NA                                                                | NA |
| <b>GO:0004723</b> | 5.3E-05 | 18 | 63  | calcium-dependent protein serine/threonine phosphatase activity   | MF |
| <b>GO:0005963</b> | 5.3E-05 | 18 | 63  | magnesium-dependent protein serine/threonine phosphatase complex  | CC |
| <b>GO:0015071</b> | 5.3E-05 | 18 | 63  | NA                                                                | NA |
| <b>GO:0017018</b> | 5.3E-05 | 18 | 63  | myosin phosphatase activity                                       | MF |
| <b>GO:0017020</b> | 5.3E-05 | 18 | 63  | myosin phosphatase regulator activity                             | MF |
| <b>GO:0017023</b> | 5.3E-05 | 18 | 63  | myosin phosphatase complex                                        | CC |
| <b>GO:0030357</b> | 5.3E-05 | 18 | 63  | NA                                                                | NA |
| <b>GO:0016594</b> | 5.4E-05 | 7  | 12  | glycine binding                                                   | MF |
| <b>GO:0030425</b> | 6.2E-05 | 43 | 227 | dendrite                                                          | CC |
| <b>GO:0005234</b> | 6.2E-05 | 7  | 12  | extracellular-glutamate-gated ion channel activity                | MF |
| <b>GO:0007204</b> | 6.5E-05 | 15 | 48  | positive regulation of cytosolic calcium ion concentration        | BP |
| <b>GO:0006810</b> | 6.6E-05 | 58 | 338 | transport                                                         | BP |
| <b>GO:0001601</b> | 6.7E-05 | 5  | 6   | peptide YY receptor activity                                      | MF |
| <b>GO:0004983</b> | 6.7E-05 | 5  | 6   | neuropeptide Y receptor activity                                  | MF |
| <b>GO:0007215</b> | 7.3E-05 | 6  | 9   | glutamate receptor signaling pathway                              | BP |
| <b>GO:0005245</b> | 7.9E-05 | 12 | 34  | voltage-gated calcium channel activity                            | MF |
| <b>GO:0004724</b> | 8.2E-05 | 18 | 65  | magnesium-dependent protein serine/threonine phosphatase activity | MF |
| <b>GO:0043005</b> | 8.9E-05 | 33 | 161 | neuron projection                                                 | CC |
| <b>GO:0043025</b> | 9.3E-05 | 48 | 266 | neuronal cell body                                                | CC |
| <b>GO:0003700</b> | 9.5E-05 | 78 | 498 | transcription factor activity, sequence-specific DNA binding      | MF |
| <b>GO:0001662</b> | 1.0E-04 | 12 | 34  | behavioral fear response                                          | BP |
| <b>GO:0043195</b> | 1.1E-04 | 15 | 50  | terminal bouton                                                   | CC |

|                   |         |    |     |                                                                           |    |
|-------------------|---------|----|-----|---------------------------------------------------------------------------|----|
| <b>GO:0046010</b> | 1.1E-04 | 4  | 4   | positive regulation of circadian sleep/wake cycle, non-REM sleep          | BP |
| <b>GO:0042312</b> | 1.2E-04 | 4  | 4   | regulation of vasodilation                                                | BP |
| <b>GO:0090331</b> | 1.2E-04 | 4  | 4   | negative regulation of platelet aggregation                               | BP |
| <b>GO:0007399</b> | 1.2E-04 | 38 | 198 | nervous system development                                                | BP |
| <b>GO:0032281</b> | 1.2E-04 | 9  | 21  | AMPA glutamate receptor complex                                           | CC |
| <b>GO:0005261</b> | 1.3E-04 | 15 | 51  | cation channel activity                                                   | MF |
| <b>GO:0008597</b> | 1.3E-04 | 18 | 67  | calcium-dependent protein serine/threonine phosphatase regulator activity | MF |
| <b>GO:0016934</b> | 1.9E-04 | 5  | 7   | extracellular-glycine-gated chloride channel activity                     | MF |
| <b>GO:0060012</b> | 1.9E-04 | 5  | 7   | synaptic transmission, glycinergic                                        | BP |
| <b>GO:0055085</b> | 1.9E-04 | 56 | 338 | transmembrane transport                                                   | BP |
| <b>GO:0043083</b> | 2.0E-04 | 5  | 7   | synaptic cleft                                                            | CC |
| <b>GO:0043647</b> | 2.0E-04 | 11 | 32  | inositol phosphate metabolic process                                      | BP |
| <b>GO:0032809</b> | 2.0E-04 | 7  | 14  | neuronal cell body membrane                                               | CC |
| <b>GO:0014050</b> | 2.1E-04 | 5  | 7   | negative regulation of glutamate secretion                                | BP |
| <b>GO:0043113</b> | 2.1E-04 | 7  | 14  | receptor clustering                                                       | BP |
| <b>GO:0034332</b> | 2.1E-04 | 11 | 32  | adherens junction organization                                            | BP |
| <b>GO:0017075</b> | 2.1E-04 | 8  | 18  | syntaxin-1 binding                                                        | MF |
| <b>GO:0090102</b> | 2.2E-04 | 7  | 14  | cochlea development                                                       | BP |
| <b>GO:0006816</b> | 2.2E-04 | 17 | 65  | calcium ion transport                                                     | BP |
| <b>GO:0007189</b> | 2.2E-04 | 8  | 18  | adenylate cyclase-activating G-protein coupled receptor signaling pathway | BP |
