# Supplementary material
Source: PubMed Central journal article supplement (PMC5897040)
Supplement: NIHMS955835-supplement-Table_S4.pdf [file NIHMS955835-supplement-Table_S4.pdf]

**Table S4. Enriched GO biological process terms in up-regulated genes**

| <b>GO ID</b>      | <b>Enrichment (p-value)</b> | <b>Number up-regulated</b> | <b>Total</b> | <b>Term</b>                                                                                                      | <b>Ontology</b> |
|-------------------|-----------------------------|----------------------------|--------------|------------------------------------------------------------------------------------------------------------------|-----------------|
| <b>GO:0006418</b> | 4.9E-07                     | 12                         | 51           | tRNA aminoacylation for protein translation                                                                      | BP              |
| <b>GO:0001666</b> | 8.2E-07                     | 17                         | 110          | response to hypoxia                                                                                              | BP              |
| <b>GO:0070059</b> | 2.2E-06                     | 7                          | 17           | intrinsic apoptotic signaling pathway in response to endoplasmic reticulum stress                                | BP              |
| <b>GO:1990622</b> | 3.9E-06                     | 4                          | 4            | CHOP-ATF3 complex                                                                                                | CC              |
| <b>GO:0042493</b> | 4.5E-06                     | 23                         | 209          | response to drug                                                                                                 | BP              |
| <b>GO:0007565</b> | 6.8E-06                     | 11                         | 54           | female pregnancy                                                                                                 | BP              |
| <b>GO:1900745</b> | 1.0E-05                     | 5                          | 8            | positive regulation of p38MAPK cascade                                                                           | BP              |
| <b>GO:0019953</b> | 1.2E-05                     | 4                          | 5            | sexual reproduction                                                                                              | BP              |
| <b>GO:1990440</b> | 1.4E-05                     | 6                          | 13           | positive regulation of transcription from RNA polymerase II promoter in response to endoplasmic reticulum stress | BP              |
| <b>GO:0004826</b> | 2.1E-05                     | 4                          | 5            | phenylalanine-tRNA ligase activity                                                                               | MF              |
| <b>GO:0006432</b> | 2.1E-05                     | 4                          | 5            | phenylalanyl-tRNA aminoacylation                                                                                 | BP              |
| <b>GO:0009328</b> | 2.1E-05                     | 4                          | 5            | phenylalanine-tRNA ligase complex                                                                                | CC              |
| <b>GO:0048146</b> | 2.4E-05                     | 8                          | 33           | positive regulation of fibroblast proliferation                                                                  | BP              |
| <b>GO:0004812</b> | 2.5E-05                     | 9                          | 43           | aminoacyl-tRNA ligase activity                                                                                   | MF              |
| <b>GO:0033210</b> | 2.7E-05                     | 4                          | 6            | leptin-mediated signaling pathway                                                                                | BP              |
| <b>GO:0045669</b> | 3.1E-05                     | 9                          | 42           | positive regulation of osteoblast differentiation                                                                | BP              |
| <b>GO:0004832</b> | 3.2E-05                     | 4                          | 7            | valine-tRNA ligase activity                                                                                      | MF              |
| <b>GO:1990441</b> | 4.4E-05                     | 4                          | 6            | negative regulation of transcription from RNA polymerase II promoter in response to endoplasmic reticulum stress | BP              |
| <b>GO:0006954</b> | 5.3E-05                     | 14                         | 108          | inflammatory response                                                                                            | BP              |
| <b>GO:0005021</b> | 5.3E-05                     | 3                          | 3            | vascular endothelial growth factor-activated receptor activity                                                   | MF              |
| <b>GO:0042730</b> | 5.4E-05                     | 4                          | 6            | fibrinolysis                                                                                                     | BP              |
| <b>GO:0003779</b> | 5.5E-05                     | 18                         | 189          | actin binding                                                                                                    | MF              |
| <b>GO:0046850</b> | 6.2E-05                     | 4                          | 7            | regulation of bone remodeling                                                                                    | BP              |
| <b>GO:2000144</b> | 6.2E-05                     | 4                          | 6            | positive regulation of DNA-templated transcription, initiation                                                   | BP              |
| <b>GO:0014032</b> | 6.9E-05                     | 4                          | 7            | neural crest cell development                                                                                    | BP              |

|                   |         |     |      |                                                                                                                        |    |
|-------------------|---------|-----|------|------------------------------------------------------------------------------------------------------------------------|----|
| <b>GO:0000976</b> | 8.6E-05 | 7   | 29   | transcription regulatory region<br>sequence-specific DNA binding                                                       | MF |
| <b>GO:0031118</b> | 8.8E-05 | 3   | 3    | rRNA pseudouridine synthesis                                                                                           | BP |
| <b>GO:0044548</b> | 1.1E-04 | 4   | 7    | S100 protein binding                                                                                                   | MF |
| <b>GO:0032040</b> | 1.1E-04 | 8   | 37   | small-subunit processome                                                                                               | CC |
| <b>GO:0060561</b> | 1.2E-04 | 3   | 3    | apoptotic process involved in<br>morphogenesis                                                                         | BP |
| <b>GO:0031668</b> | 1.2E-04 | 5   | 15   | cellular response to extracellular<br>stimulus                                                                         | BP |
| <b>GO:0008285</b> | 1.2E-04 | 23  | 261  | negative regulation of cell<br>proliferation                                                                           | BP |
| <b>GO:0036488</b> | 1.3E-04 | 3   | 3    | CHOP-C/EBP complex                                                                                                     | CC |
| <b>GO:0010941</b> | 1.3E-04 | 5   | 12   | regulation of cell death                                                                                               | BP |
| <b>GO:0030515</b> | 1.8E-04 | 6   | 22   | snoRNA binding                                                                                                         | MF |
| <b>GO:0036499</b> | 2.0E-04 | 5   | 13   | PERK-mediated unfolded protein<br>response                                                                             | BP |
| <b>GO:0005737</b> | 2.1E-04 | 157 | 3272 | cytoplasm                                                                                                              | CC |
| <b>GO:0060022</b> | 2.7E-04 | 3   | 4    | hard palate development                                                                                                | BP |
| <b>GO:0030546</b> | 2.8E-04 | 4   | 9    | receptor activator activity                                                                                            | MF |
| <b>GO:0030308</b> | 3.1E-04 | 11  | 81   | negative regulation of cell growth                                                                                     | BP |
| <b>GO:0008284</b> | 3.2E-04 | 22  | 246  | positive regulation of cell<br>proliferation                                                                           | BP |
| <b>GO:0060674</b> | 3.2E-04 | 4   | 9    | placenta blood vessel development                                                                                      | BP |
| <b>GO:0009314</b> | 3.2E-04 | 6   | 25   | response to radiation                                                                                                  | BP |
| <b>GO:0001077</b> | 3.2E-04 | 15  | 139  | transcriptional activator activity,<br>RNA polymerase II core promoter<br>proximal region sequence-specific<br>binding | MF |
| <b>GO:0006968</b> | 3.2E-04 | 4   | 10   | cellular defense response                                                                                              | BP |
| <b>GO:0042542</b> | 3.4E-04 | 8   | 41   | response to hydrogen peroxide                                                                                          | BP |
| <b>GO:0006936</b> | 3.4E-04 | 9   | 54   | muscle contraction                                                                                                     | BP |
| <b>GO:0000978</b> | 3.4E-04 | 17  | 172  | RNA polymerase II core promoter<br>proximal region sequence-specific<br>DNA binding                                    | MF |
| <b>GO:0045471</b> | 4.0E-04 | 10  | 72   | response to ethanol                                                                                                    | BP |
| <b>GO:0008237</b> | 4.1E-04 | 10  | 76   | metallopeptidase activity                                                                                              | MF |
| <b>GO:0038021</b> | 4.5E-04 | 2   | 2    | leptin receptor activity                                                                                               | MF |
| <b>GO:0009612</b> | 4.7E-04 | 7   | 37   | response to mechanical stimulus                                                                                        | BP |
| <b>GO:0006865</b> | 4.8E-04 | 6   | 34   | amino acid transport                                                                                                   | BP |
| <b>GO:0009615</b> | 5.3E-04 | 9   | 58   | response to virus                                                                                                      | BP |
| <b>GO:0038028</b> | 5.5E-04 | 2   | 2    | insulin receptor signaling pathway<br>via phosphatidylinositol 3-kinase                                                | BP |
| <b>GO:0051591</b> | 5.8E-04 | 7   | 39   | response to cAMP                                                                                                       | BP |

|                   |         |    |     |                                                                                                          |    |
|-------------------|---------|----|-----|----------------------------------------------------------------------------------------------------------|----|
| <b>GO:0004888</b> | 6.0E-04 | 8  | 56  | transmembrane signaling receptor activity                                                                | MF |
| <b>GO:0070410</b> | 6.7E-04 | 4  | 11  | co-SMAD binding                                                                                          | MF |
| <b>GO:0051973</b> | 6.8E-04 | 5  | 19  | positive regulation of telomerase activity                                                               | BP |
| <b>GO:0071394</b> | 6.8E-04 | 3  | 6   | cellular response to testosterone stimulus                                                               | BP |
| <b>GO:0008203</b> | 7.5E-04 | 6  | 31  | cholesterol metabolic process                                                                            | BP |
| <b>GO:2000379</b> | 7.8E-04 | 5  | 18  | positive regulation of reactive oxygen species metabolic process                                         | BP |
| <b>GO:0046628</b> | 7.9E-04 | 4  | 14  | positive regulation of insulin receptor signaling pathway                                                | BP |
| <b>GO:0010593</b> | 8.1E-04 | 2  | 2   | negative regulation of lamellipodium assembly                                                            | BP |
| <b>GO:0030199</b> | 8.4E-04 | 4  | 16  | collagen fibril organization                                                                             | BP |
| <b>GO:0070561</b> | 8.5E-04 | 2  | 2   | vitamin D receptor signaling pathway                                                                     | BP |
| <b>GO:0006438</b> | 8.6E-04 | 2  | 2   | valyl-tRNA aminoacylation                                                                                | BP |
| <b>GO:0008140</b> | 9.0E-04 | 4  | 13  | cAMP response element binding protein binding                                                            | MF |
| <b>GO:0032355</b> | 9.0E-04 | 10 | 78  | response to estradiol                                                                                    | BP |
| <b>GO:0000982</b> | 9.0E-04 | 4  | 12  | transcription factor activity, RNA polymerase II core promoter proximal region sequence-specific binding | MF |
| <b>GO:0071260</b> | 9.2E-04 | 8  | 55  | cellular response to mechanical stimulus                                                                 | BP |
| <b>GO:0061029</b> | 9.4E-04 | 4  | 13  | eyelid development in camera-type eye                                                                    | BP |
| <b>GO:0043066</b> | 9.4E-04 | 27 | 350 | negative regulation of apoptotic process                                                                 | BP |
| <b>GO:0030506</b> | 9.7E-04 | 3  | 9   | ankyrin binding                                                                                          | MF |
