# Supplementary material
Source: PubMed Central journal article supplement (PMC5897040)

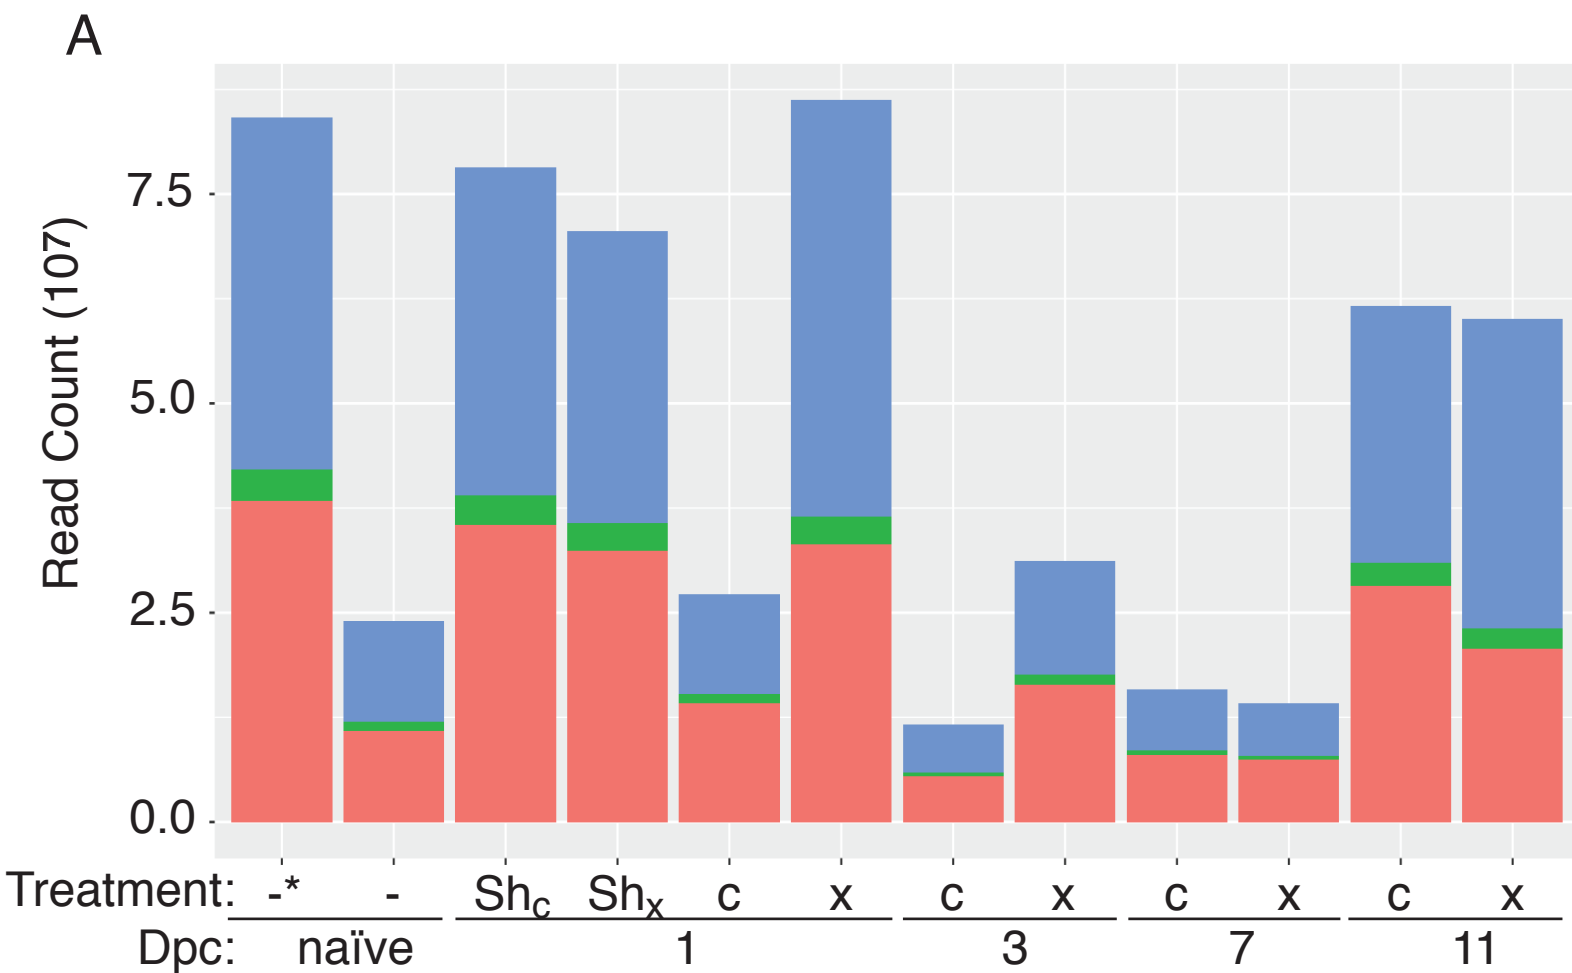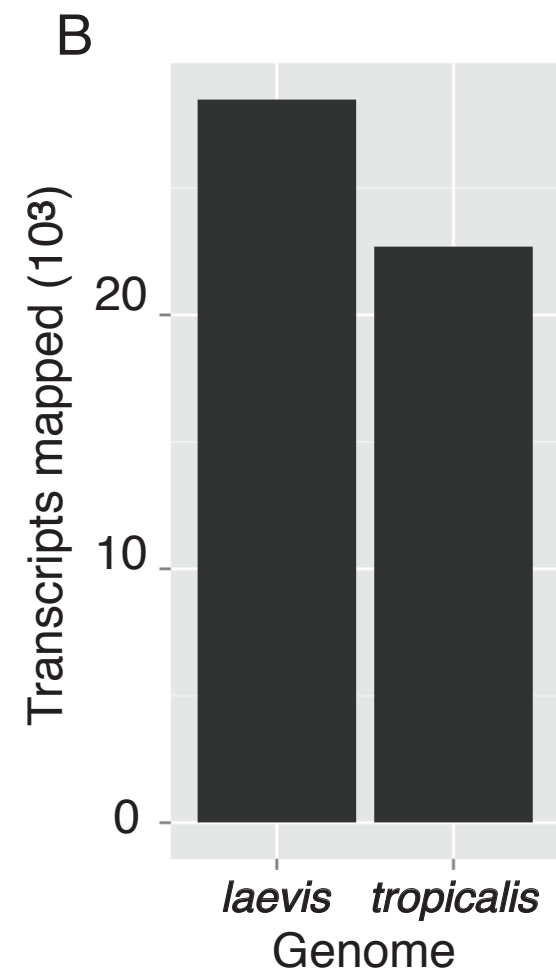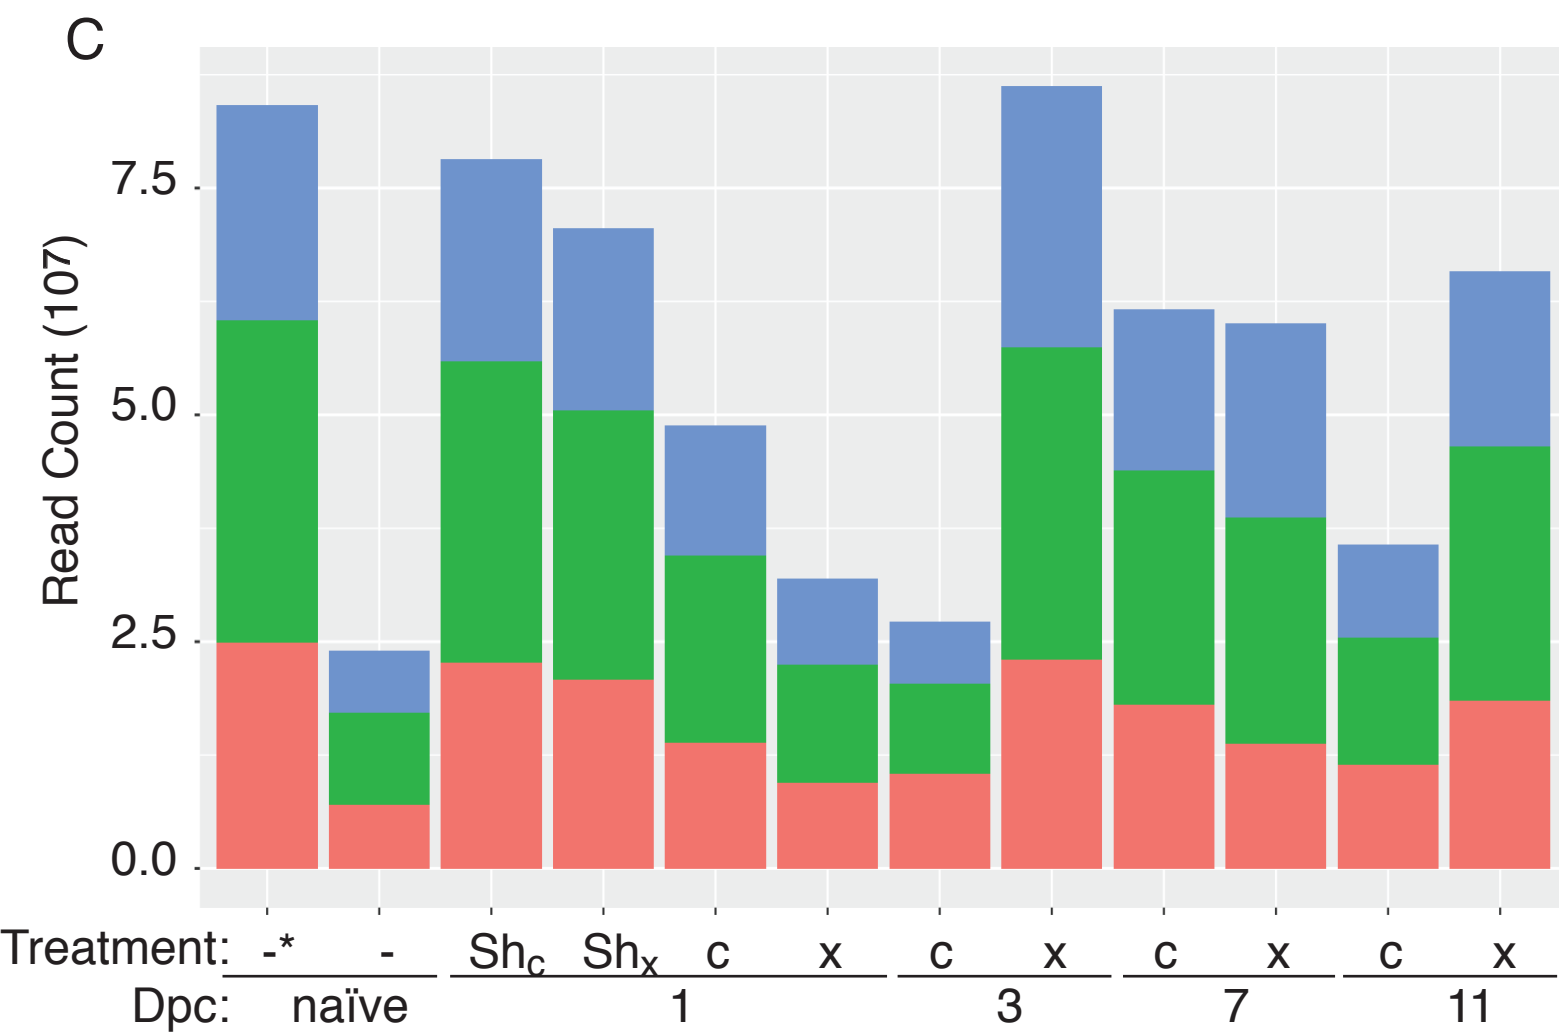

Supplement: NIHMS955835-supplement-Figure_S1.pdf [file NIHMS955835-supplement-Figure_S1.pdf]

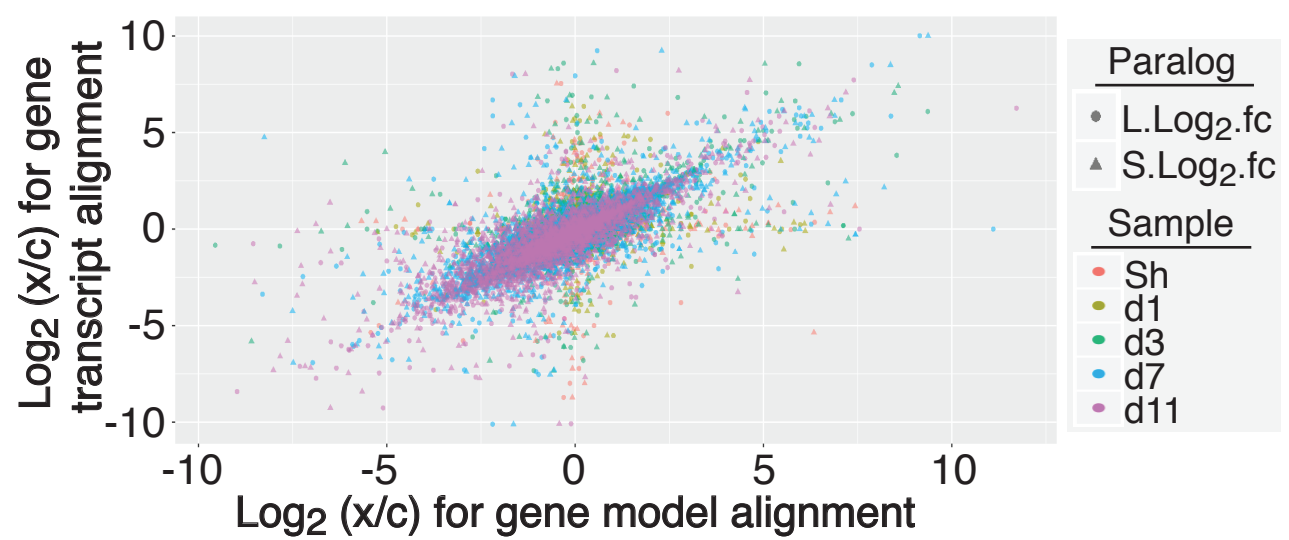

Supplement: NIHMS955835-supplement-Figure_S2.pdf [file NIHMS955835-supplement-Figure_S2.pdf]

A

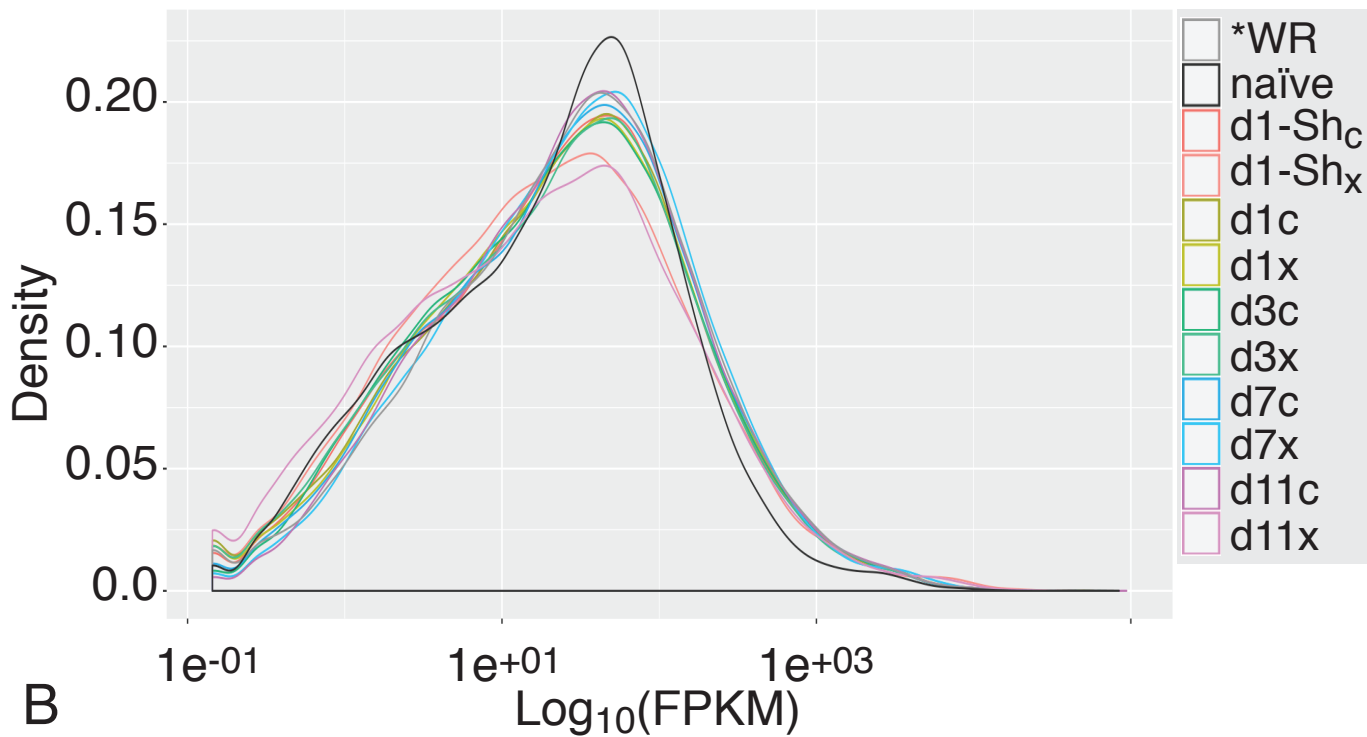

B

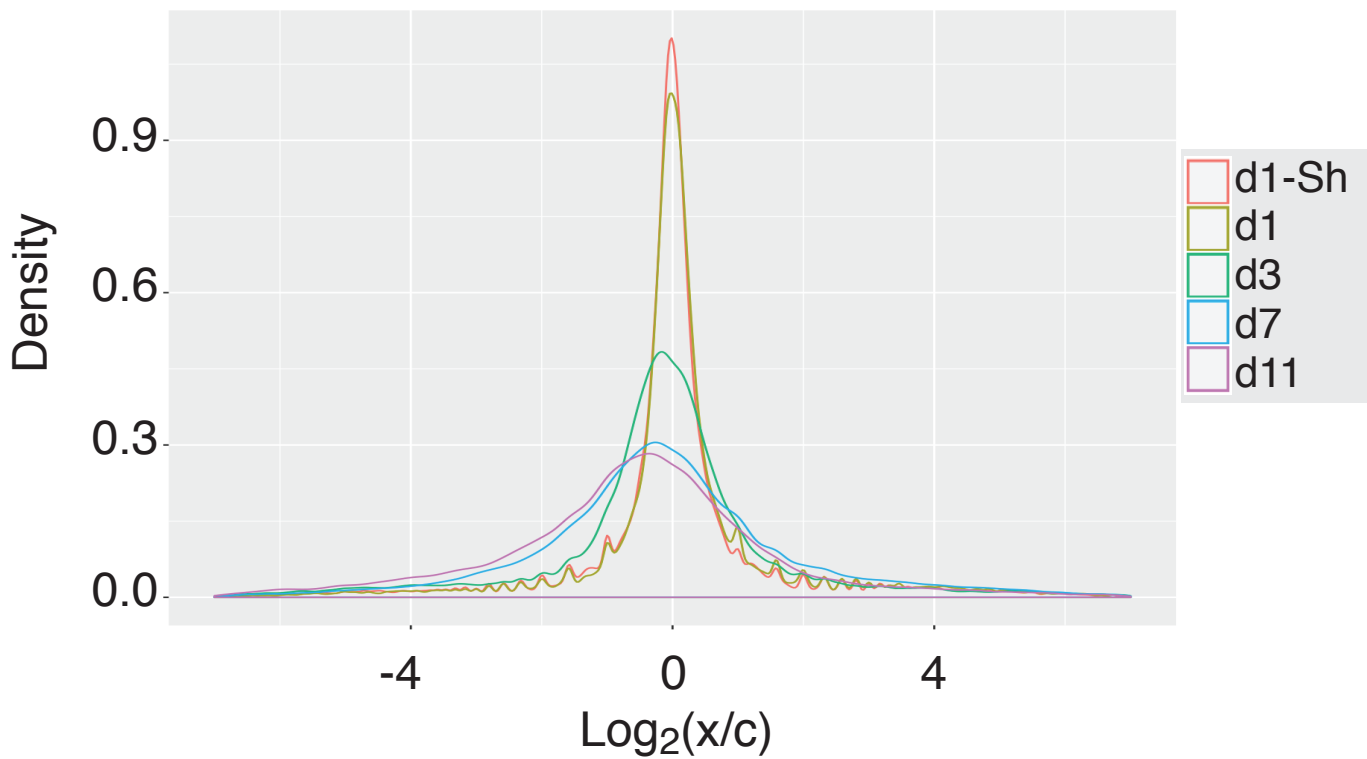

Supplement: NIHMS955835-supplement-Figure_S3.pdf [file NIHMS955835-supplement-Figure_S3.pdf]

**A**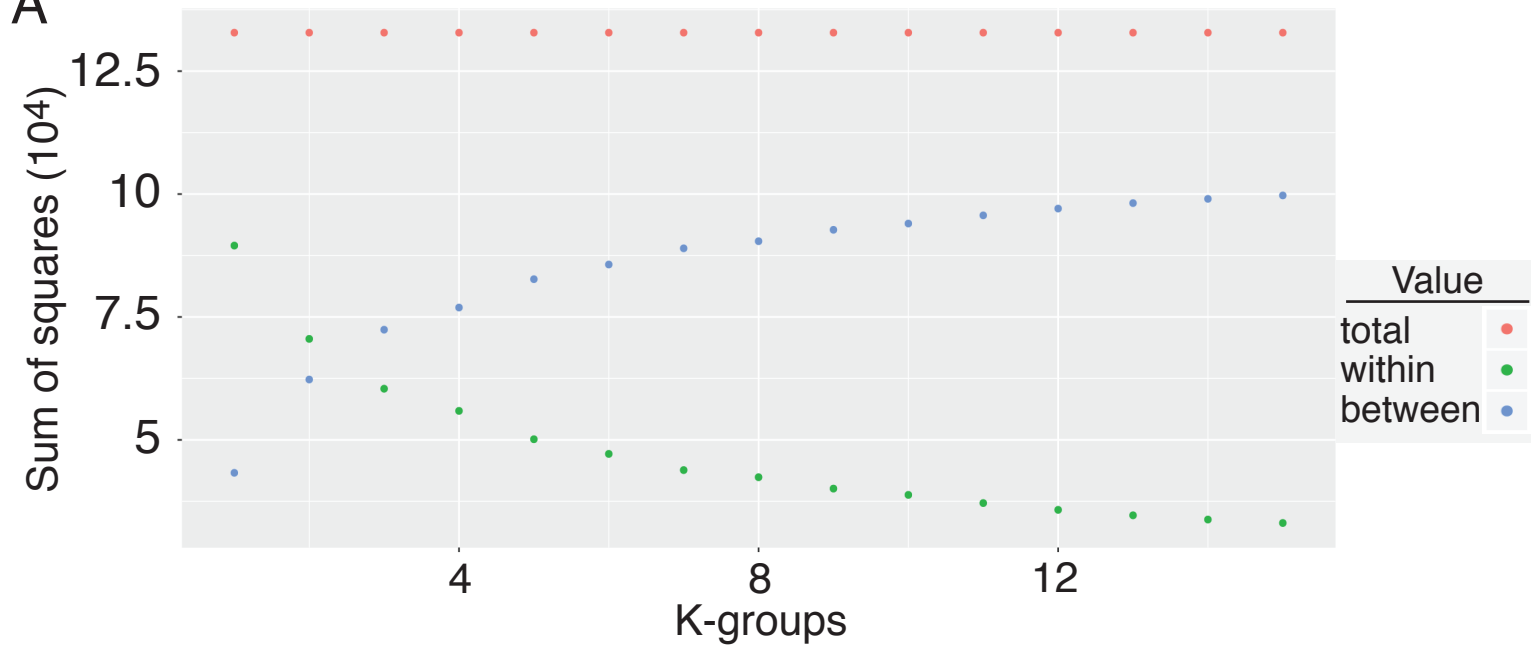**B**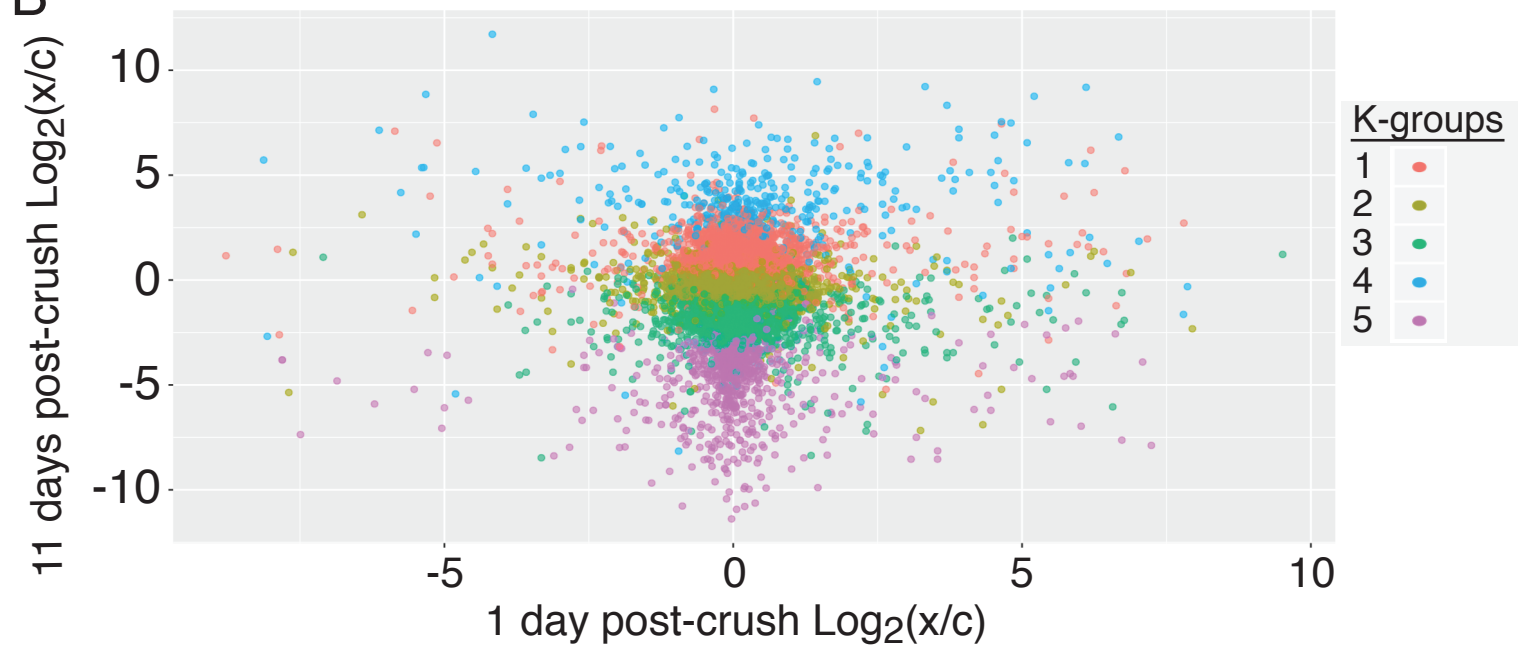

Supplement: NIHMS955835-supplement-Figure_S4.pdf [file NIHMS955835-supplement-Figure_S4.pdf]

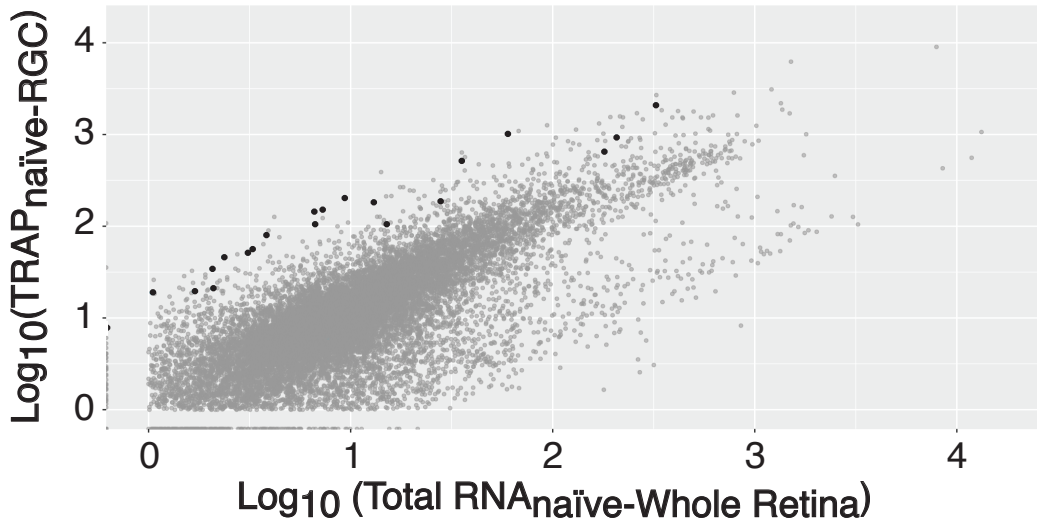

Supplement: NIHMS955835-supplement-Figure_S5.pdf [file NIHMS955835-supplement-Figure_S5.pdf]

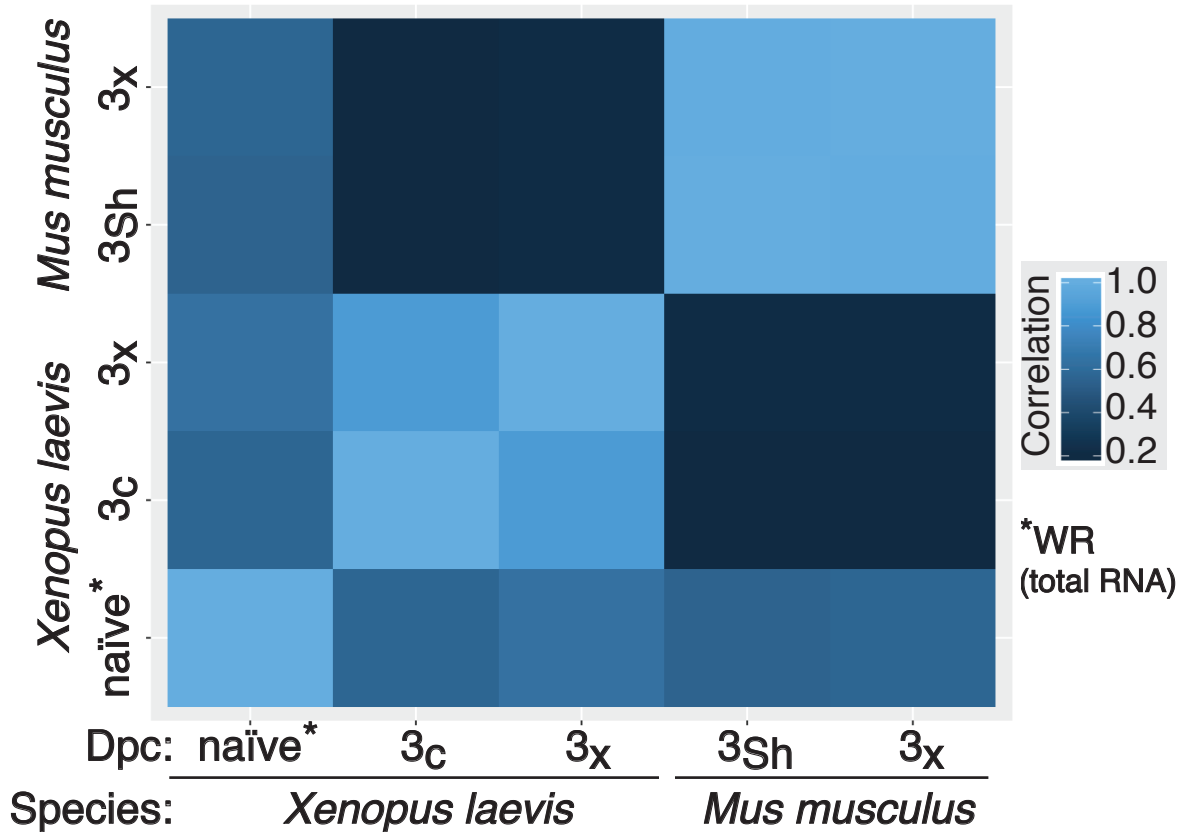

Supplement: NIHMS955835-supplement-Figure_S6.pdf [file NIHMS955835-supplement-Figure_S6.pdf]

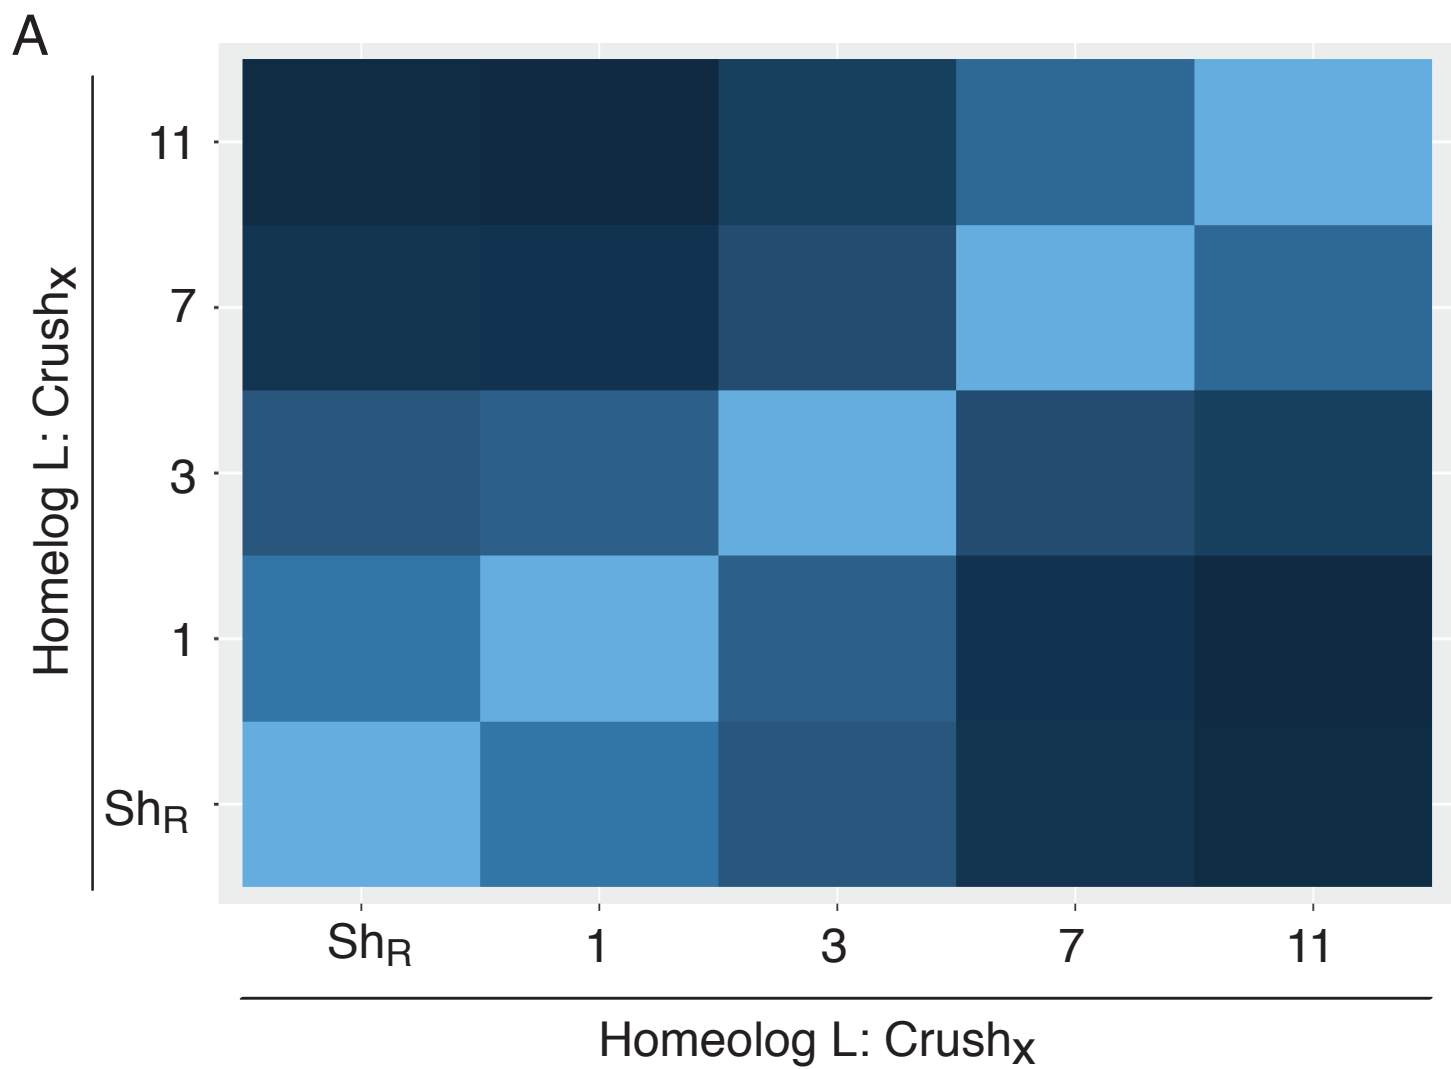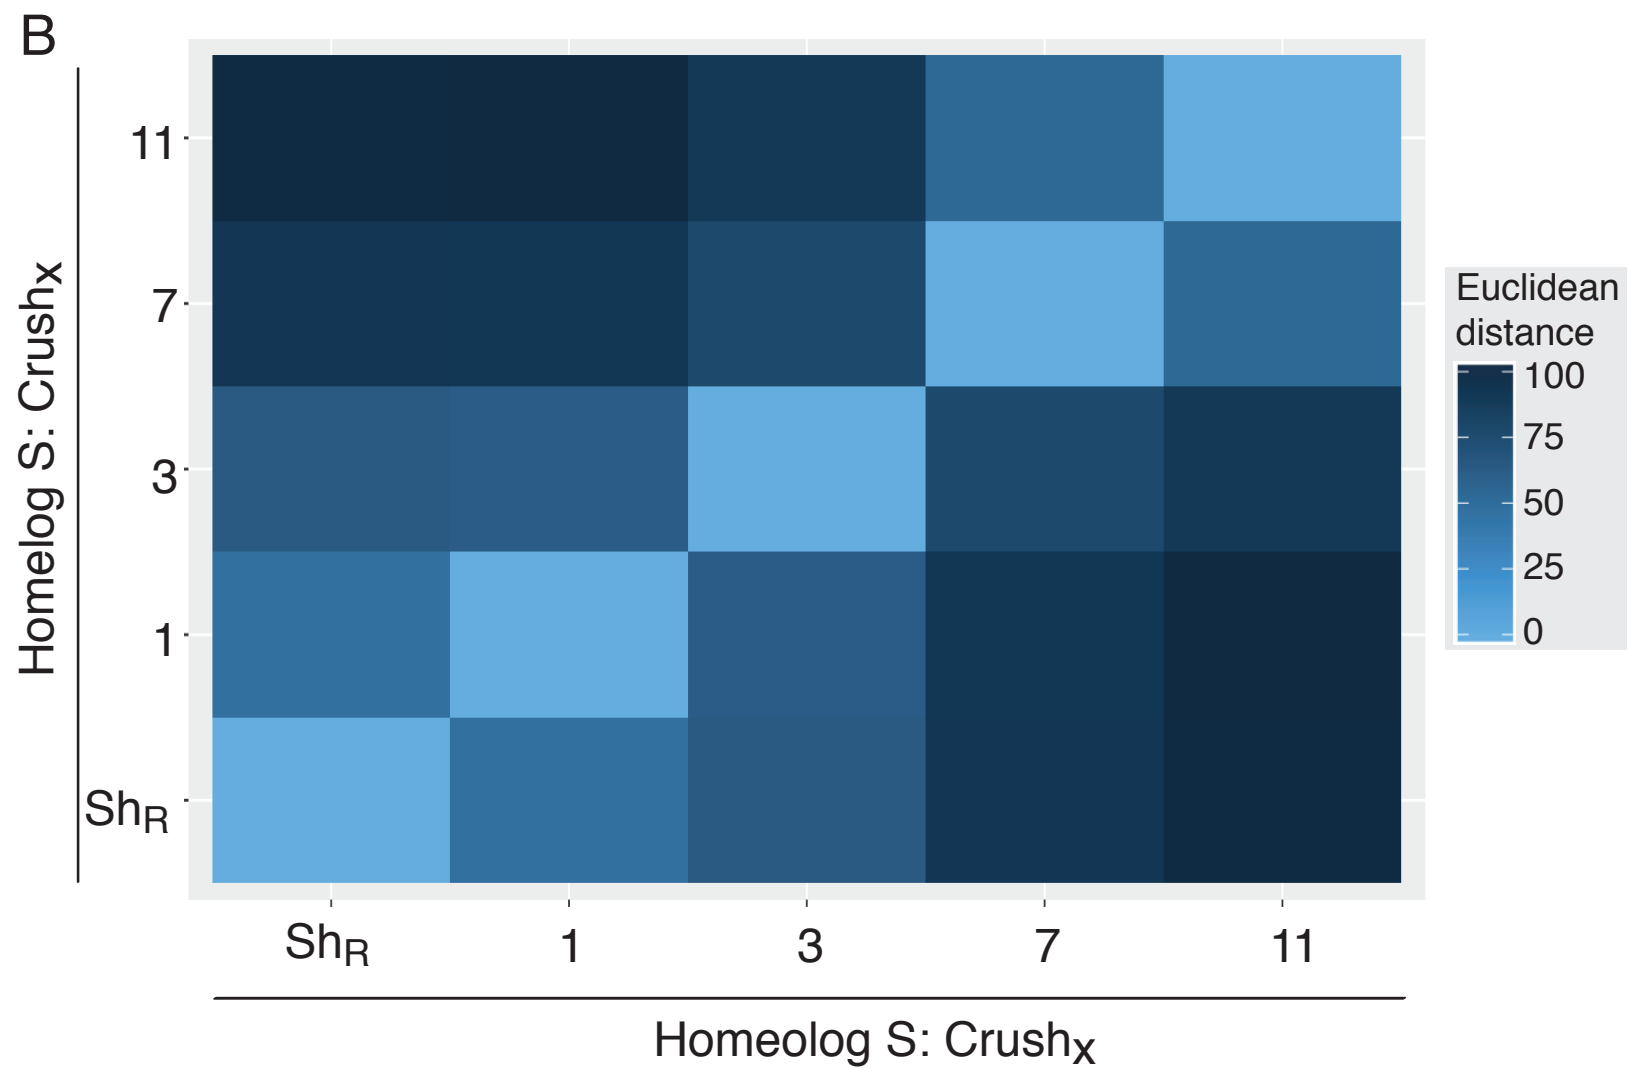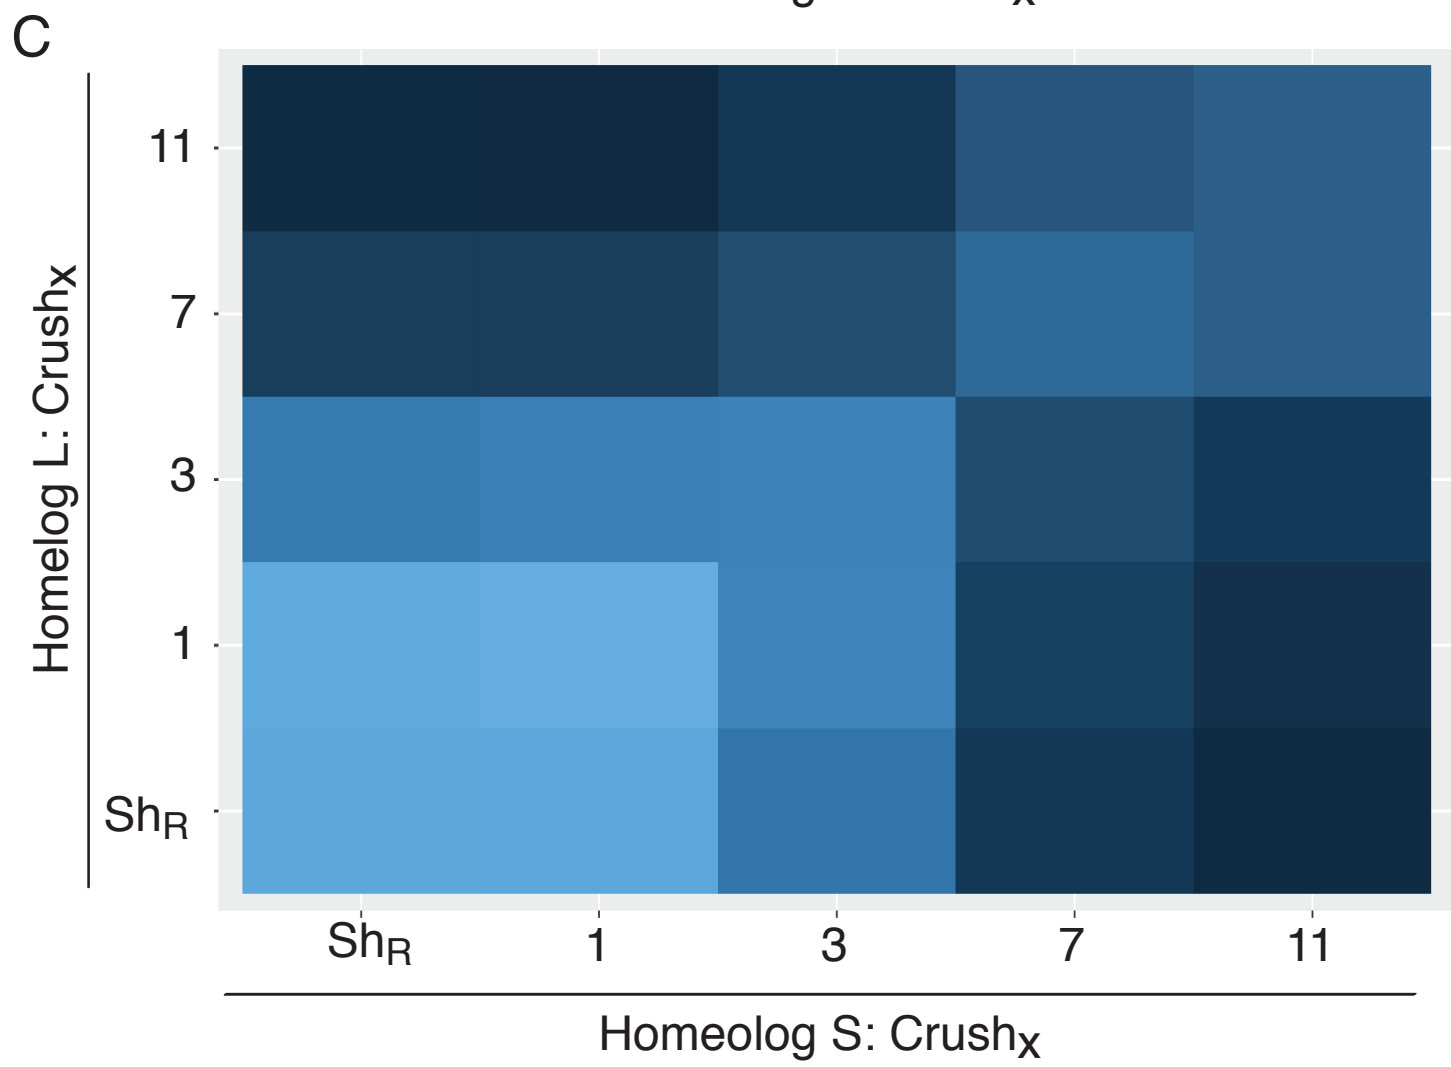

Supplement: NIHMS955835-supplement-Figure_S7.pdf [file NIHMS955835-supplement-Figure_S7.pdf]

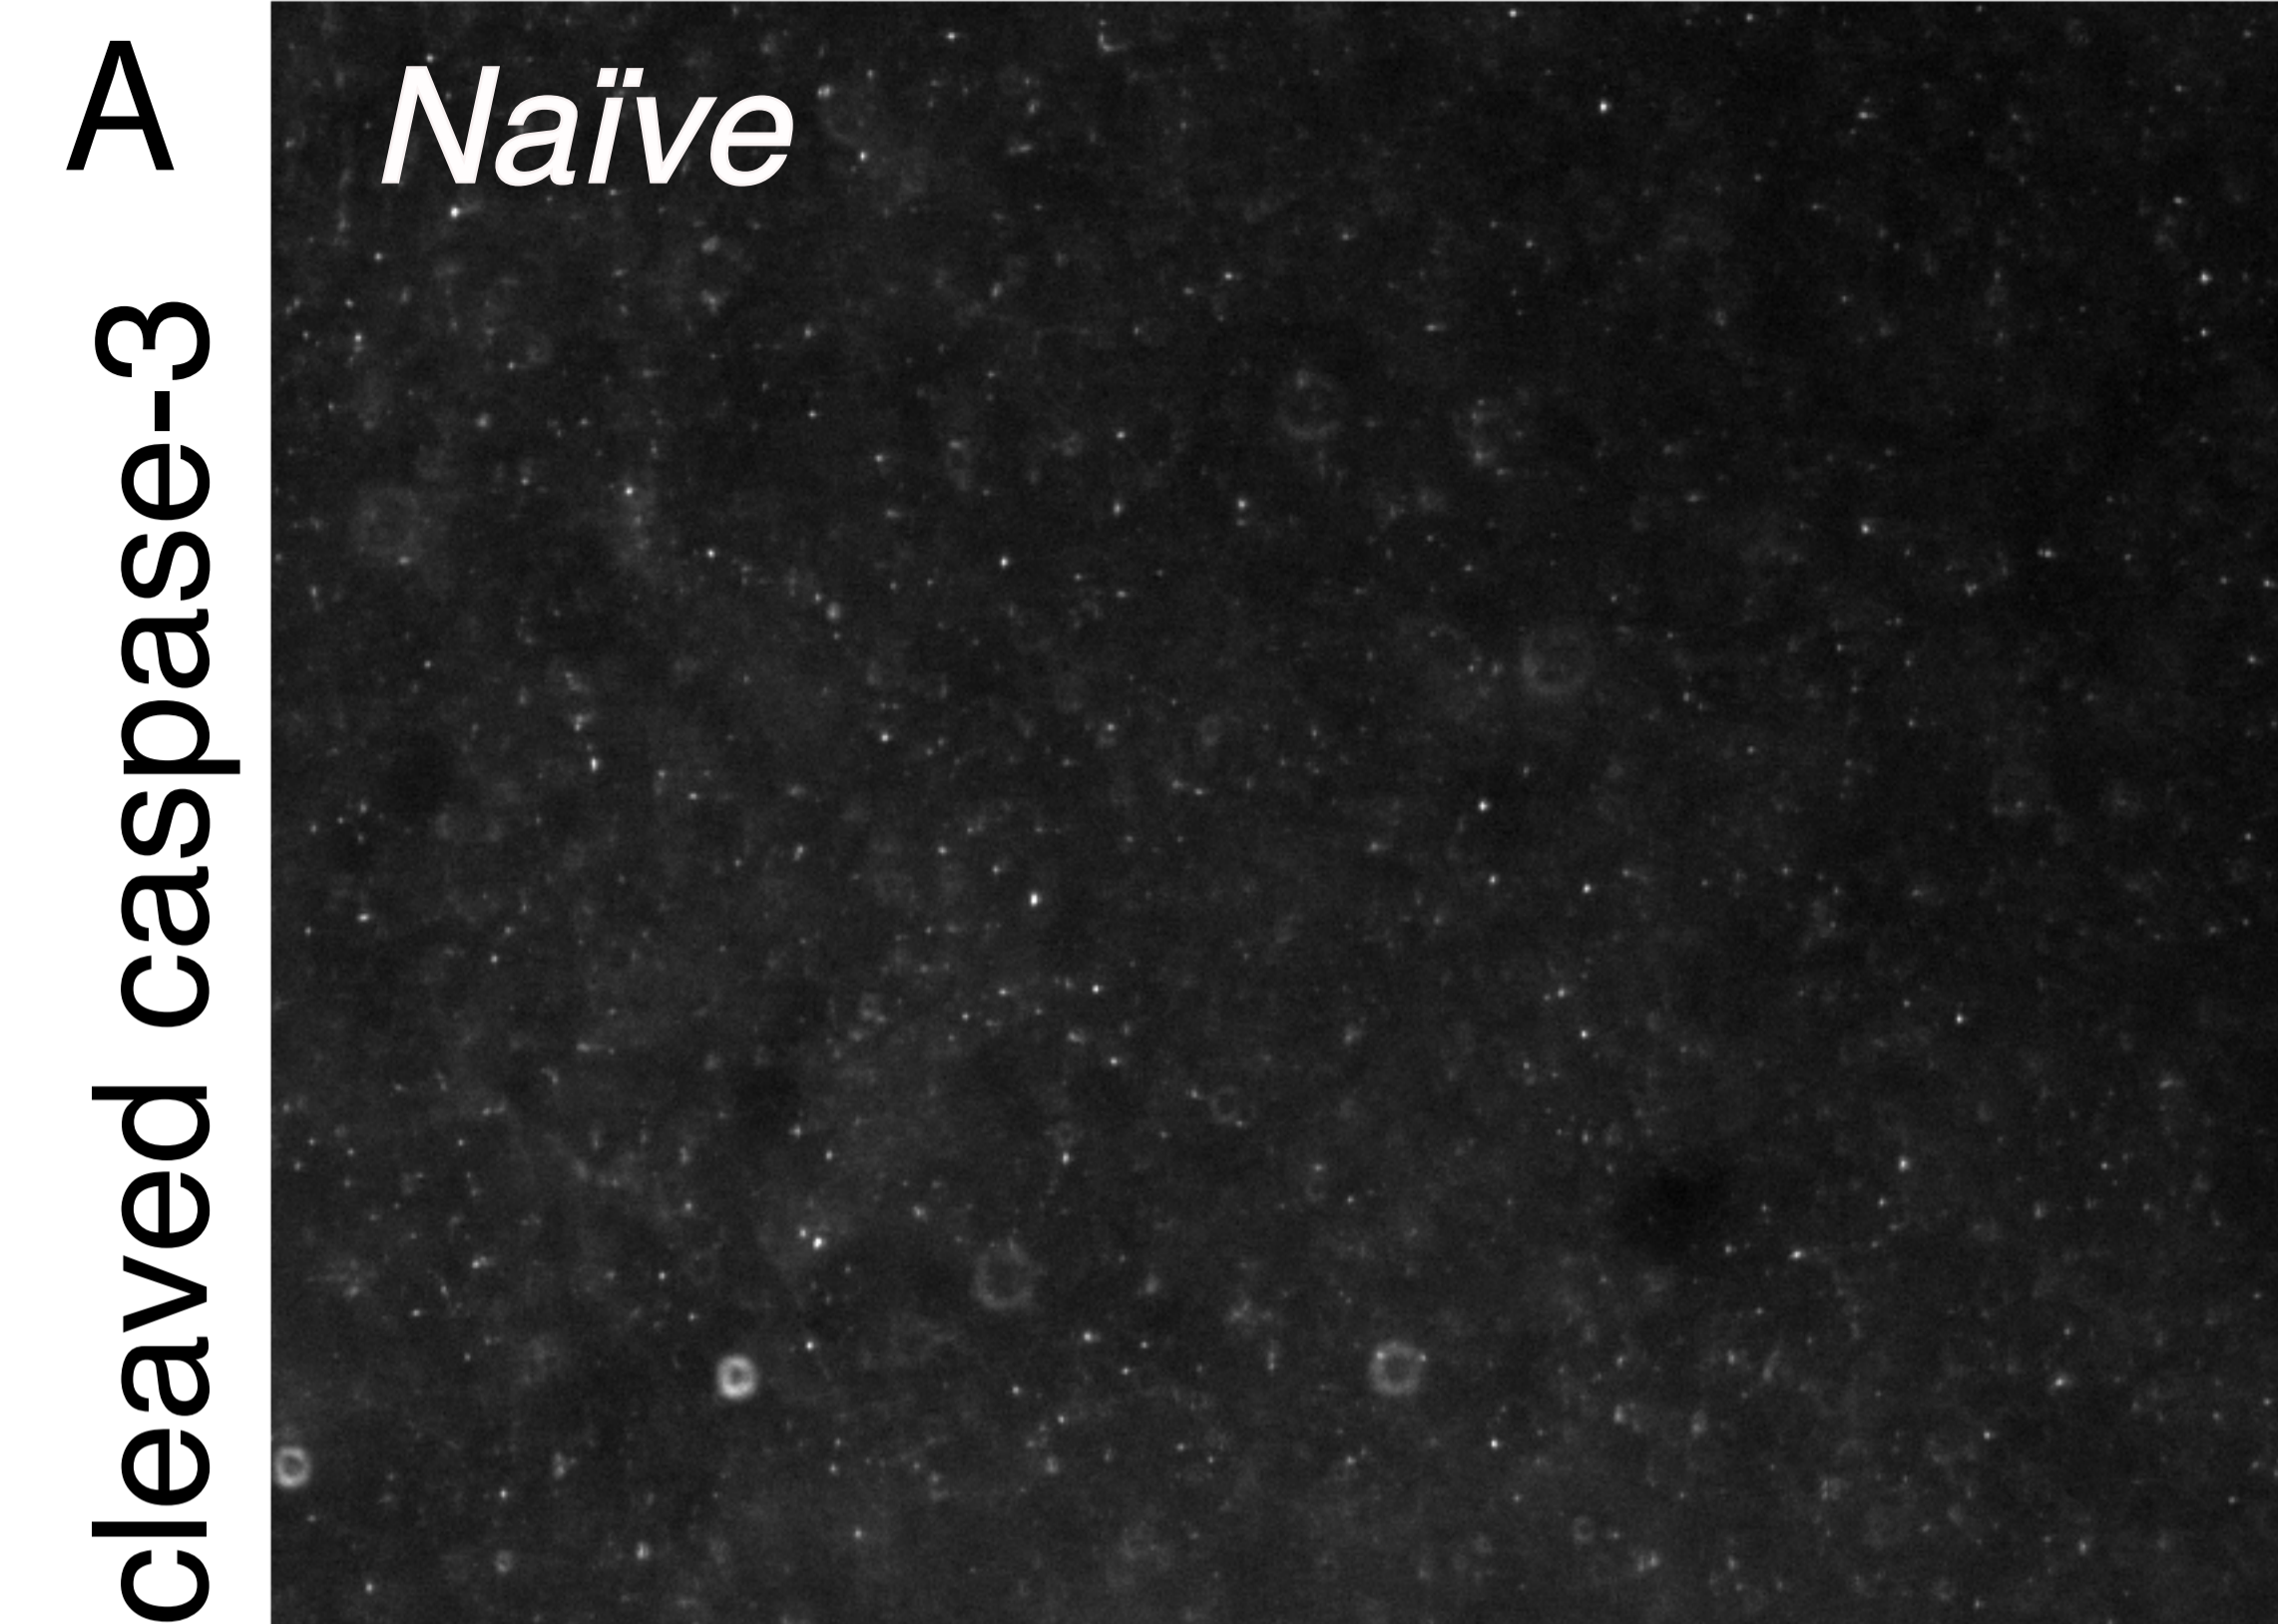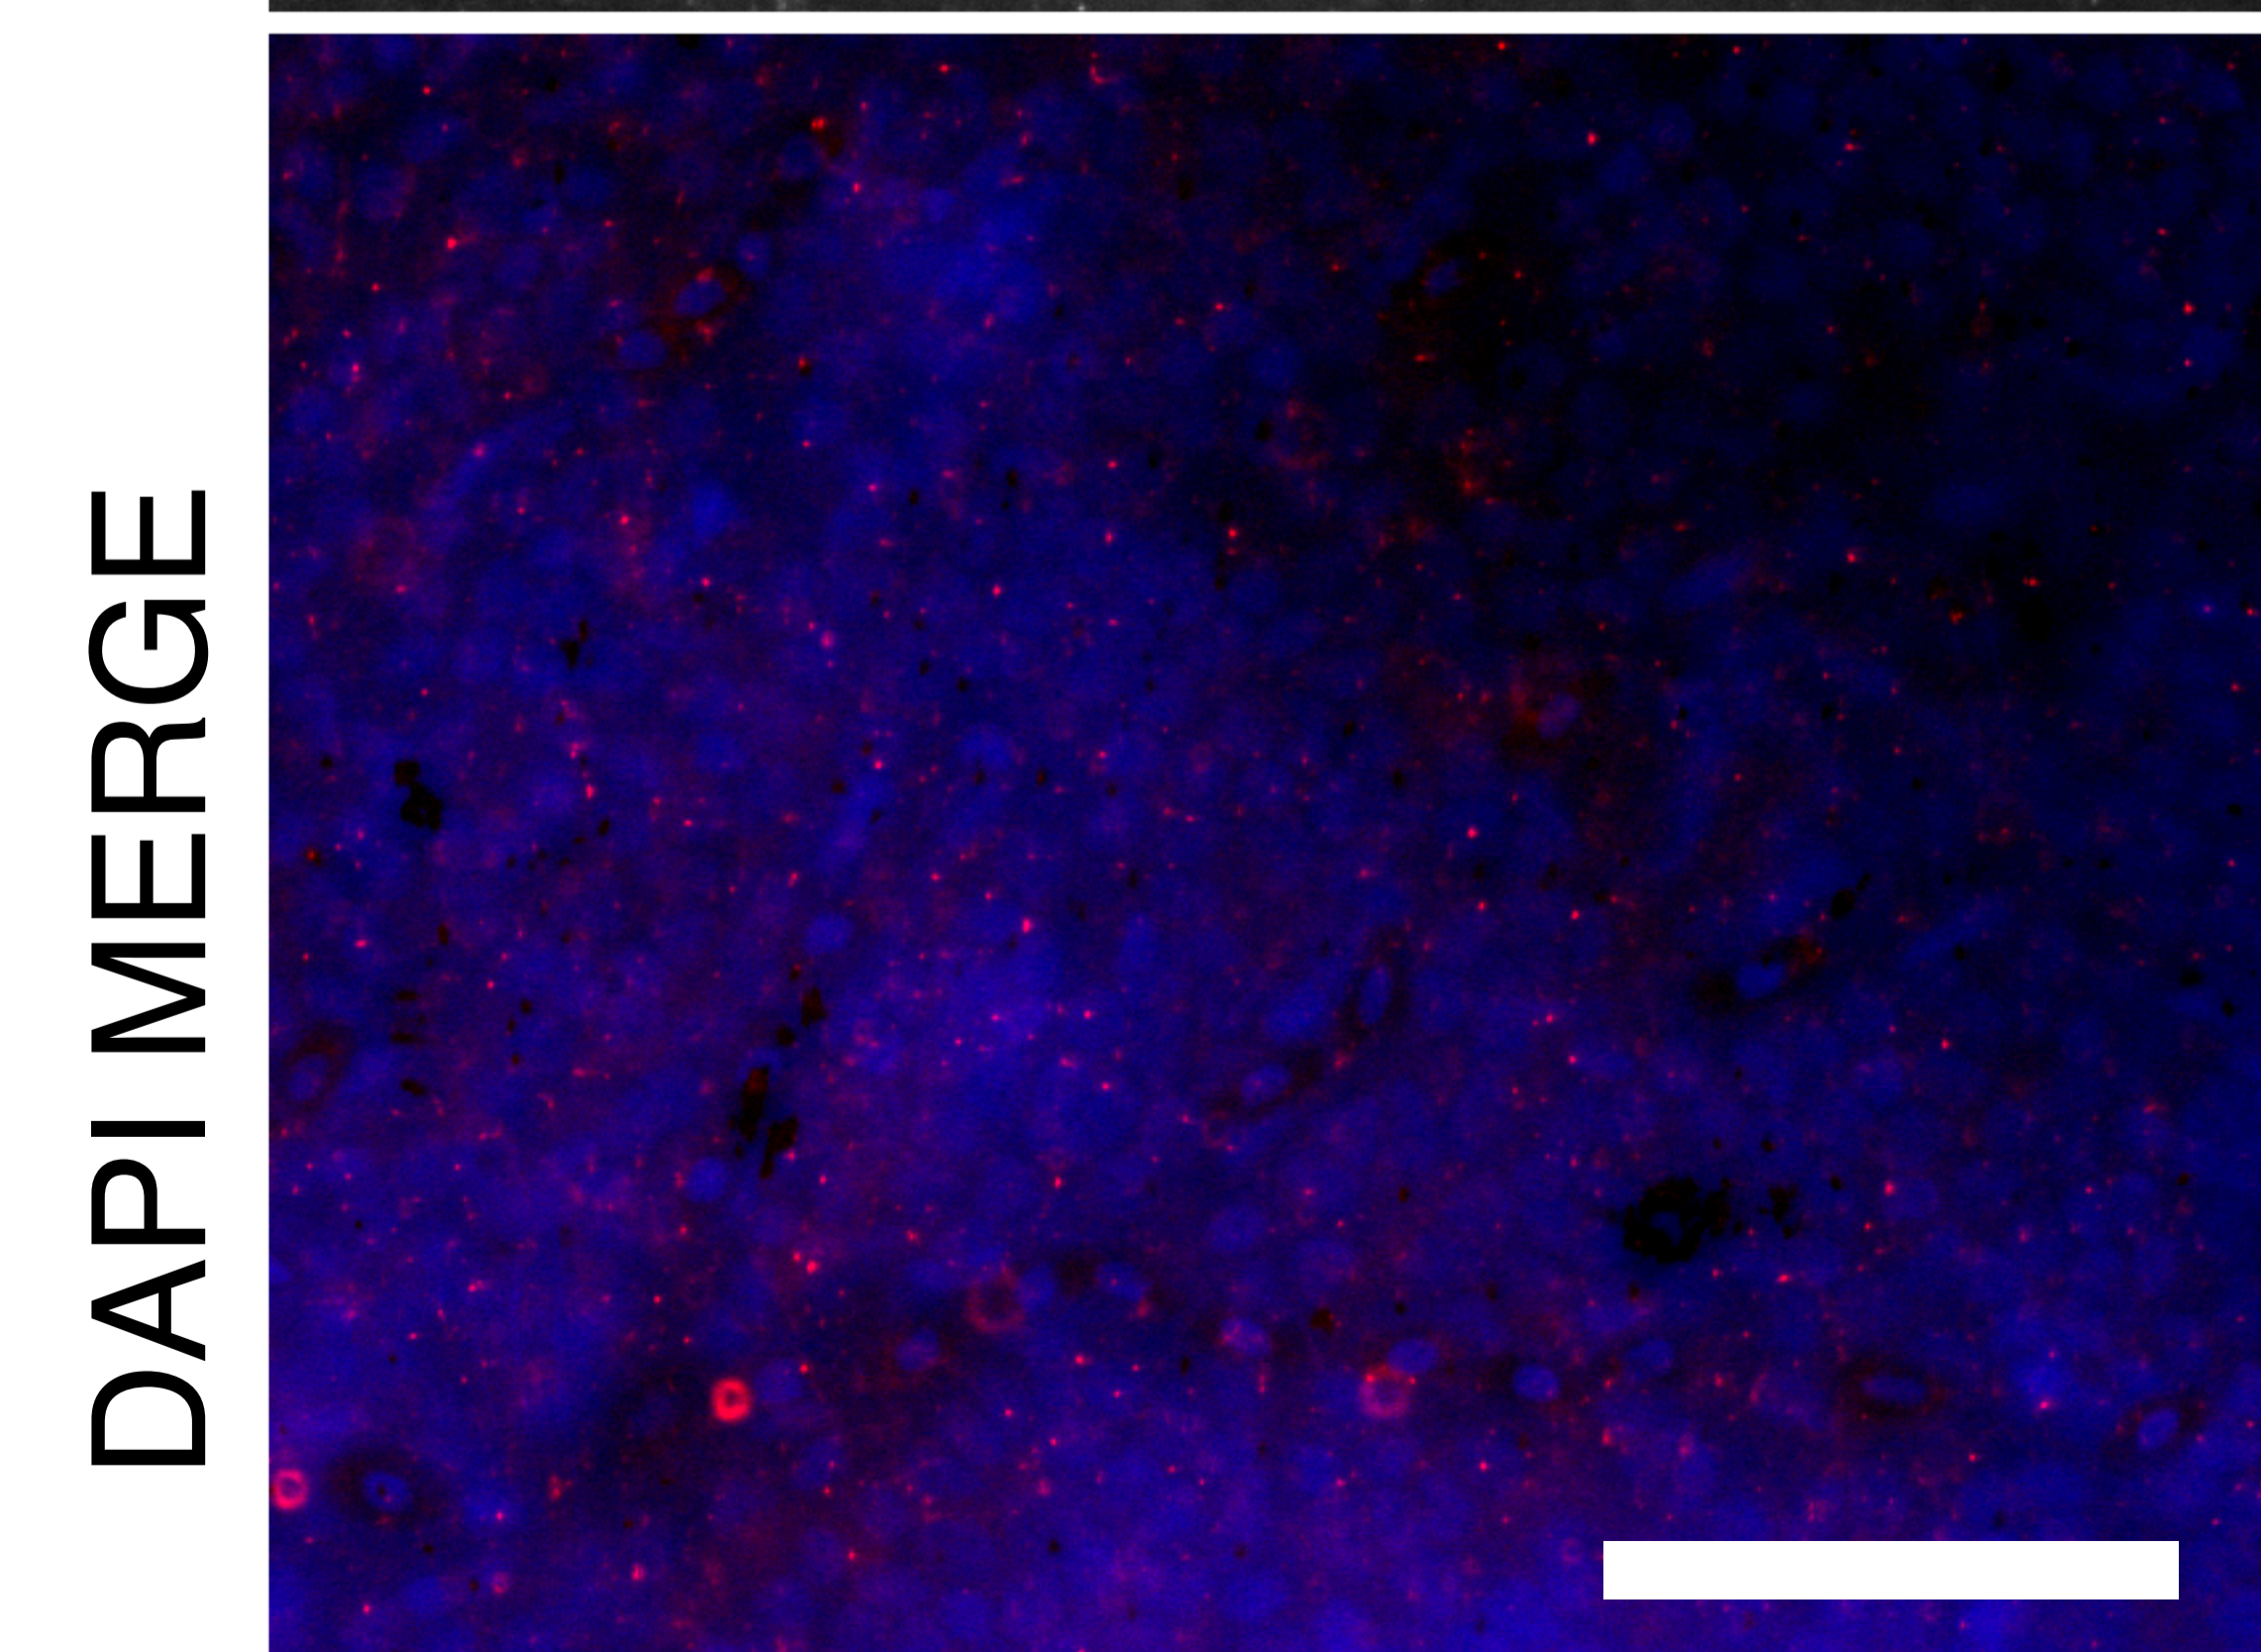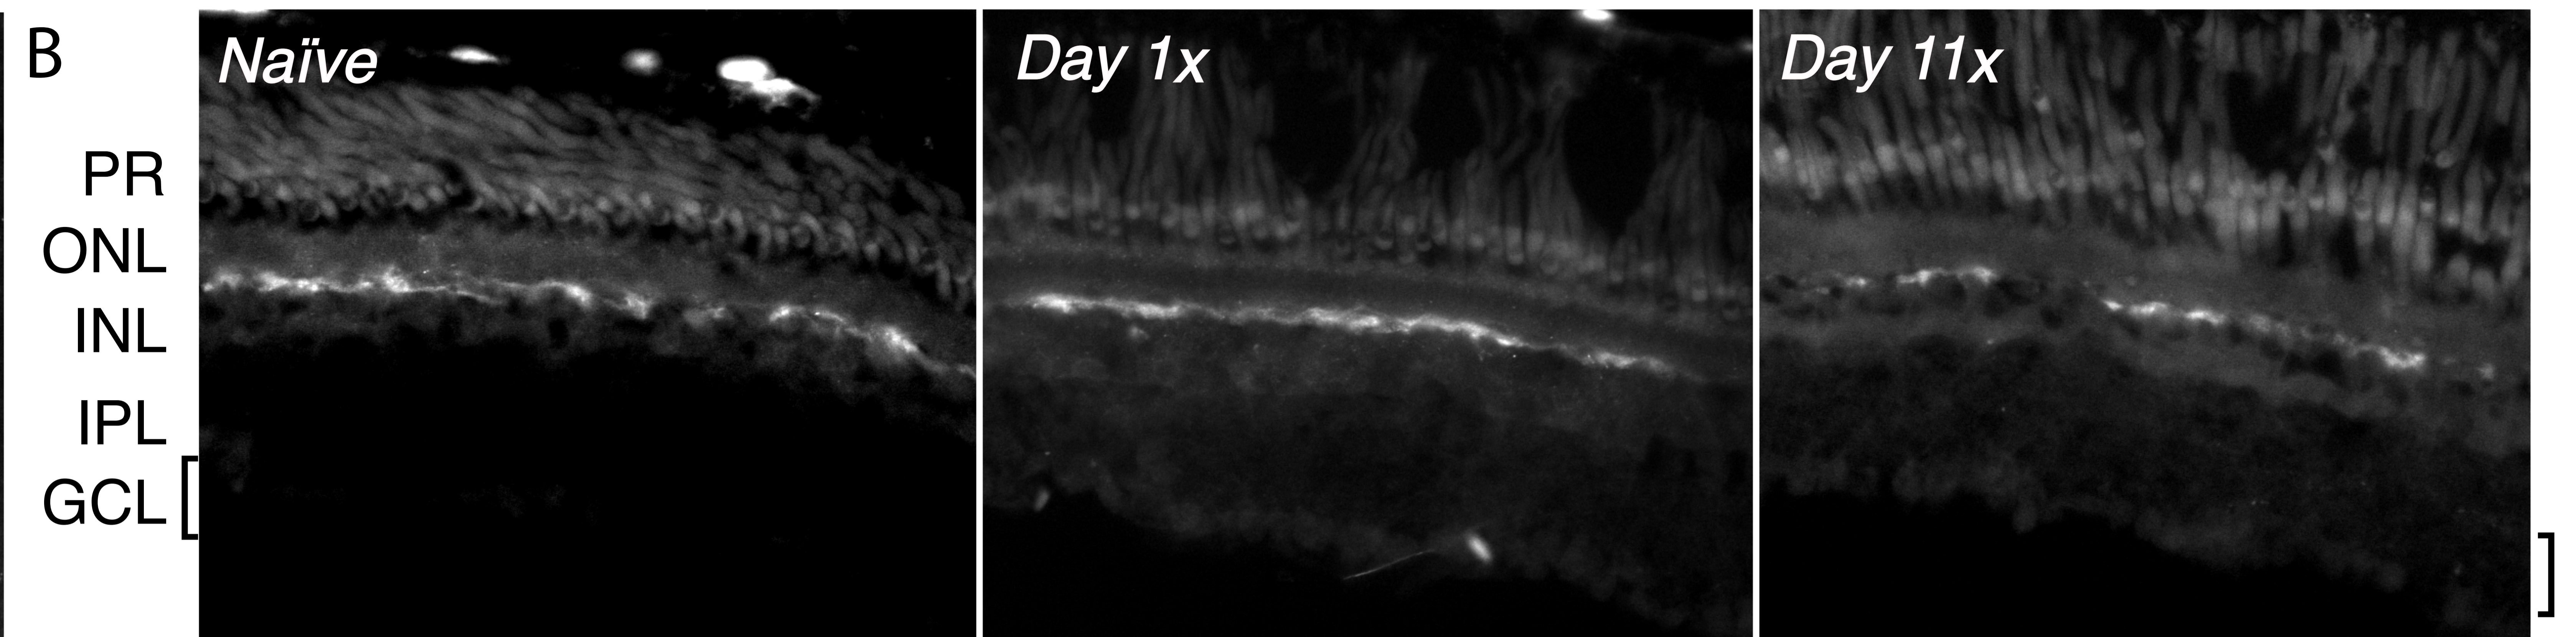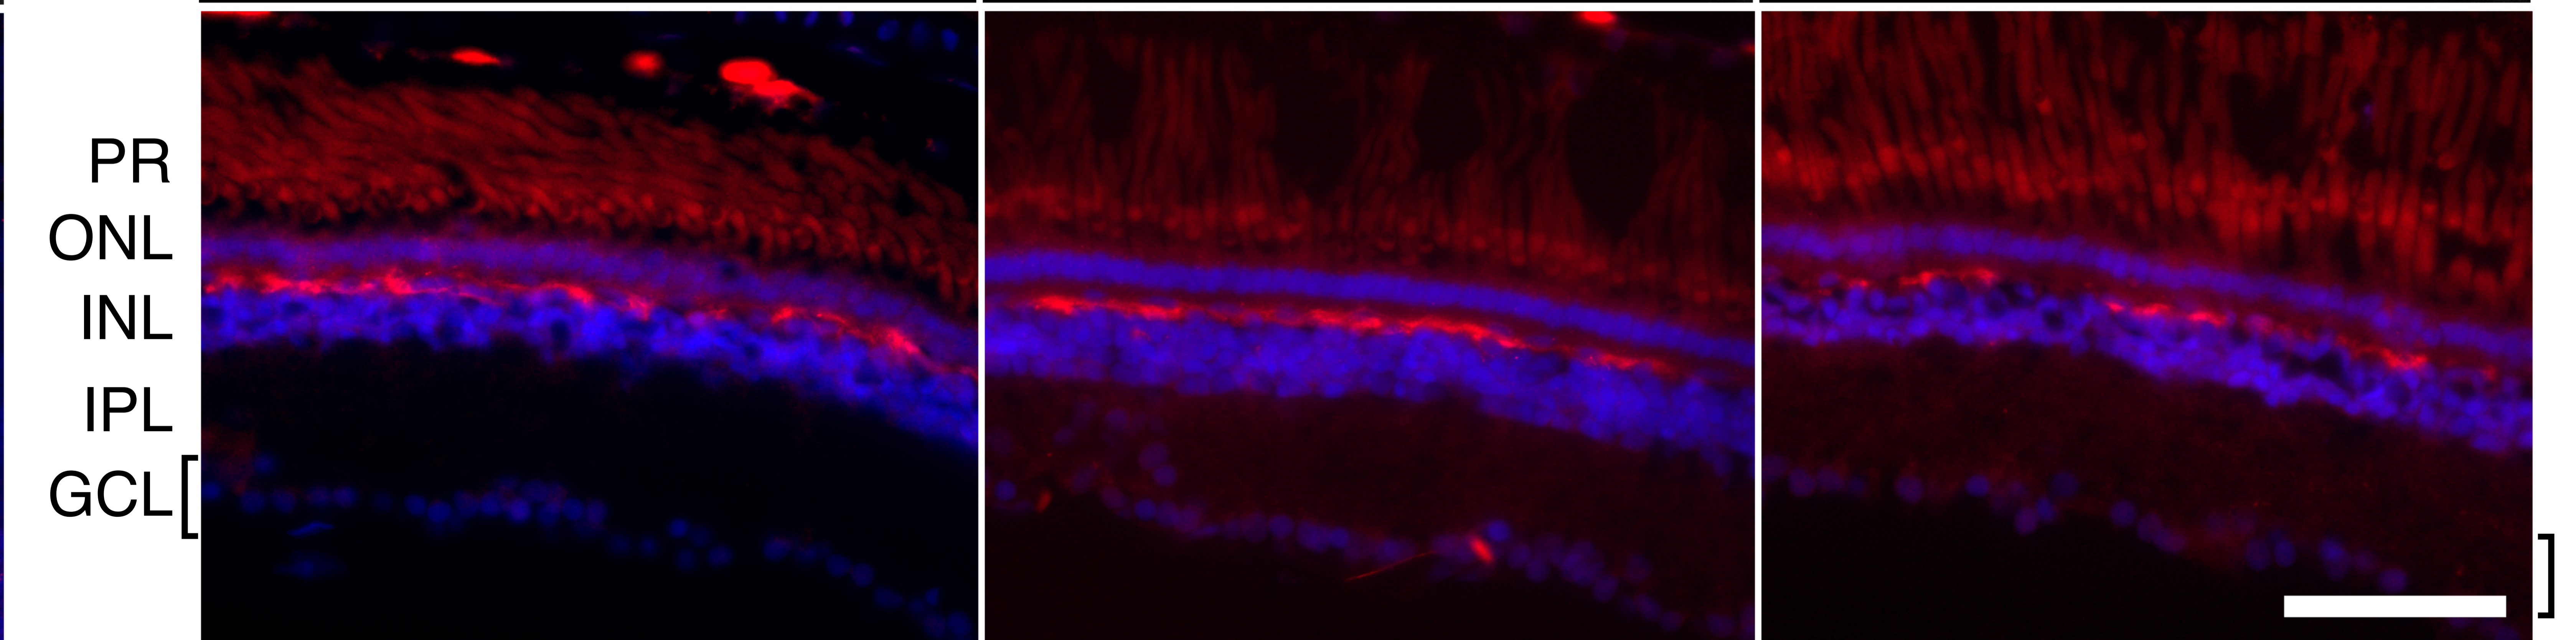

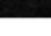

Supplement: NIHMS955835-supplement-Figure_S9.pdf [file NIHMS955835-supplement-Figure_S9.pdf]
